# Supplementary material for: Spatial Ecology of Bacteria at the Microscale in Soil
Source: PLoS One. 2014 Jan 28;9(1):e87217. doi: 10.1371/journal.pone.0087217 (PMC3905020; doi:10.1371/journal.pone.0087217)
Supplement: Appendix S1 — Notes on the theory of Log Gaussian Cox Processes. (DOC) [file pone.0087217.s002.doc]

Notes on the theory of Log Gaussian Cox Processes

Cox processes are models for aggregated point processes where the aggregation is caused by an environmental heterogeneity [1]⁠. A Cox process is said “doubly stochastic” as it arises as an inhomogeneous Poisson process with a random intensity measure. In a Log Gaussian Cox Processes (LGCP) the environmental heterogeneity is modeled by a Gaussian process so that the properties of the LGCP and the Gaussian process are identical. For our study, we have considered Gaussian processes with an exponential covariance function:

(S1)

so that, the Gaussian process (and the LGCP) is solely determined by three parameters, its mean (μ), variance (σ) and scale (β). A homogeneous Poisson process (Complete Spatial Randomness) may be considered as the limit of a LGCP as σ tends to zero.

The intensity λ of a LGCP (the number of points per unit area or volume) is

(S2)

LGCP are analytically tractable: the Ripley's K function for a 2D point process is

(S3)

whereas, for a 3D point process, it is :

(S4)

where *C(s)* is the covariance function (Eq. S1).

Combining Eqs S2, S3 and S4 gives the theoretical number of cells around an average cell in 3D

(S5)

1. Møller J, Waagepetersen RP, Syversveen AR (1998) Log Gaussian Cox processes. Scand J Stat 25: 451–482.
